# Supplementary material
Source: PubMed Central journal article supplement (PMC5024713)
Supplement: NIHMS809156-supplement-Supplement1.pdf [file NIHMS809156-supplement-Supplement1.pdf]

## Supplementary Appendix

This appendix has been provided by the authors to give readers additional information about their work.

Supplement to: Goss PE, Ingle JN, Pritchard KI, et al. Extending aromatase-inhibitor adjuvant therapy to 10 years. N Engl J Med 2016;374:209-19. DOI: 10.1056/NEJMoa1604700

(PDF updated June 23, 2016.)

## Appendix

### Table of Contents

|                                                     |       |      |
|-----------------------------------------------------|-------|------|
| S1 Methods of Quality of Life Analysis              | ..... | 2    |
| S2 Adjudication of Cause of Death                   | ..... | 3    |
| Figure S1 CONSORT Flow Diagram                      | ..... | 4    |
| Figure S2 Study Schema                              | ..... | 5    |
| Table S1 Protocol Reportable Serious Adverse Events | ..... | 6-7  |
| Table S2 Baseline Characteristics                   | ..... | 8-10 |
| Trial Registration                                  | ..... | 11   |

### **Suppl S1: Methods of Quality of Life Analysis**

For the SF36 physical and mental component summary scores, the 8 subscales, and the MENQOL 4 symptom subscales, between-treatment group comparisons of change scores from baseline were conducted using longitudinal linear mixed models, which include all women who had at least one assessment. Treatment group and time (of assessment), and interactions of treatment group with time (group x time) were included as fixed covariates in the initial models. Random intercepts in the model was used to account for the dependence of repeated measures. If interaction term was significant at 0.05 level, comparisons between treatment groups at each assessment time point are conducted using Wilcoxon tests. Otherwise, a reduced model without the interaction term was refitted and overall differences between change scores of treatment groups were assessed based on the coefficient of the treatment term in the reduced model.

## **Suppl S2: Adjudication of Cause of Death**

The approved protocol does not make reference to adjudication of deaths. Our standard operating procedure requires all data on cause of death reported by the investigators to be centrally monitored, with selected data, including primary endpoint and death (as well as other serious adverse events etc.), undergoing medical review. If after medical review the physician reviewer requires additional information to confirm investigator assessment of cause of death, a query is issued so that cause of death can be properly categorized. We do not routinely collect supporting documentation related to cause of death (e.g. discharge summary, death certificate, autopsy report) but physician reviewing can request these if necessary for clarification.

Suppl Figure S1: CONSORT Flow Diagram

### CONSORT Flow Diagram

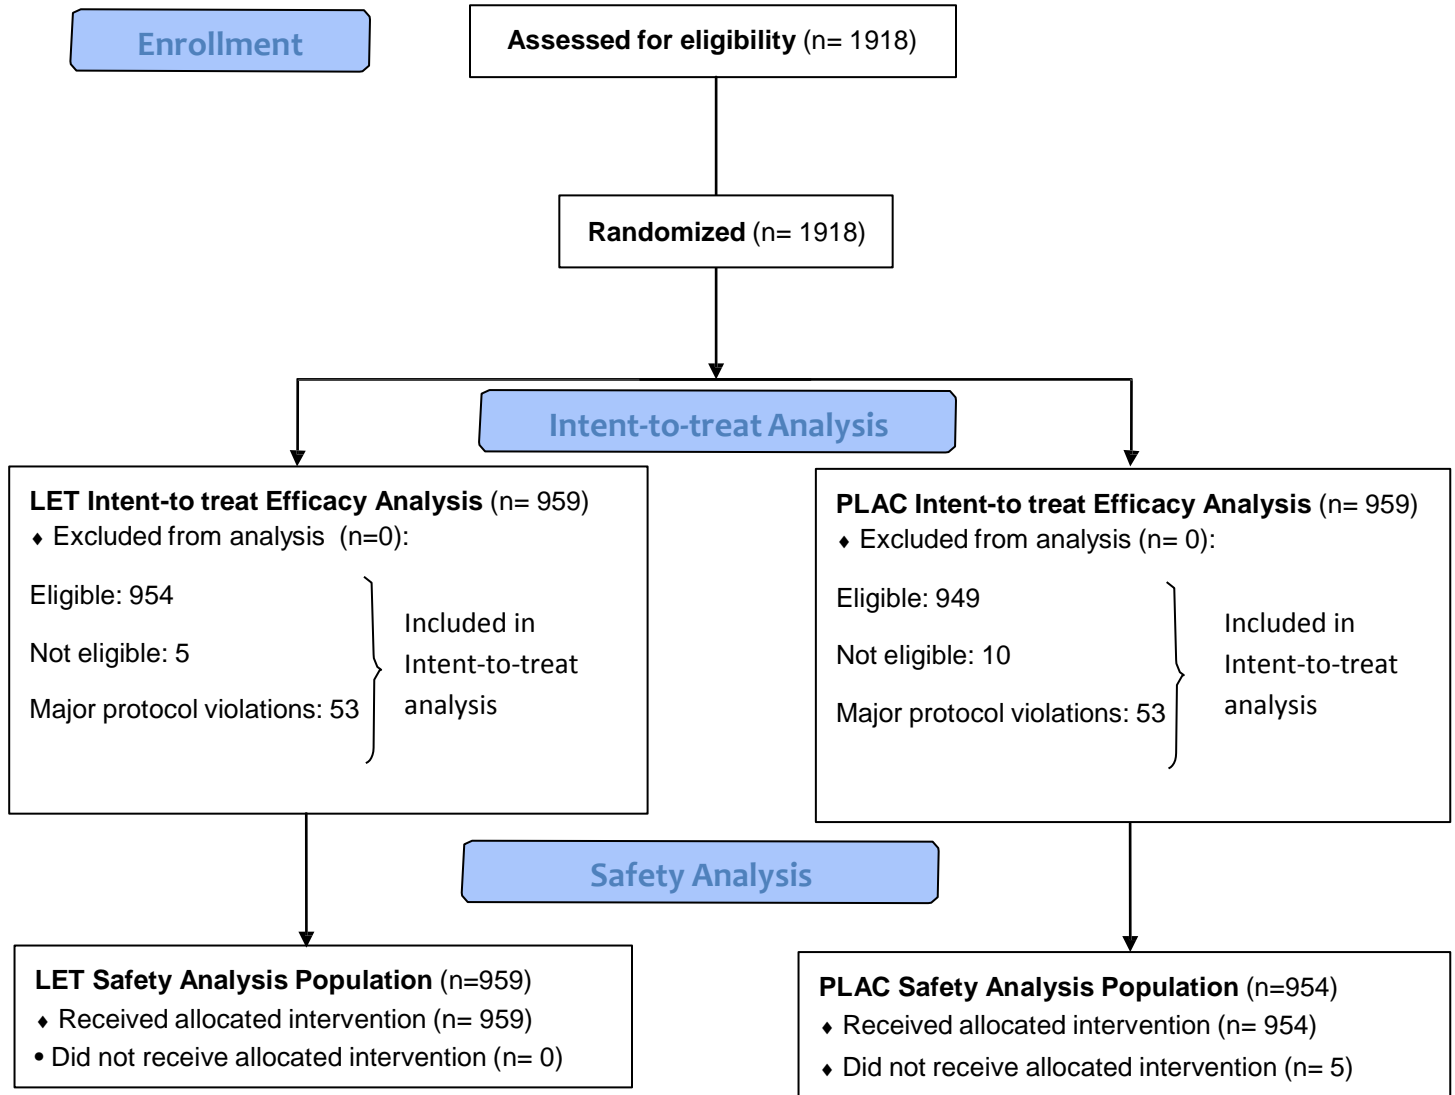

LET: Letrozole; PLAC: Placebo

Suppl Figure S2: MA.17R Study Schema

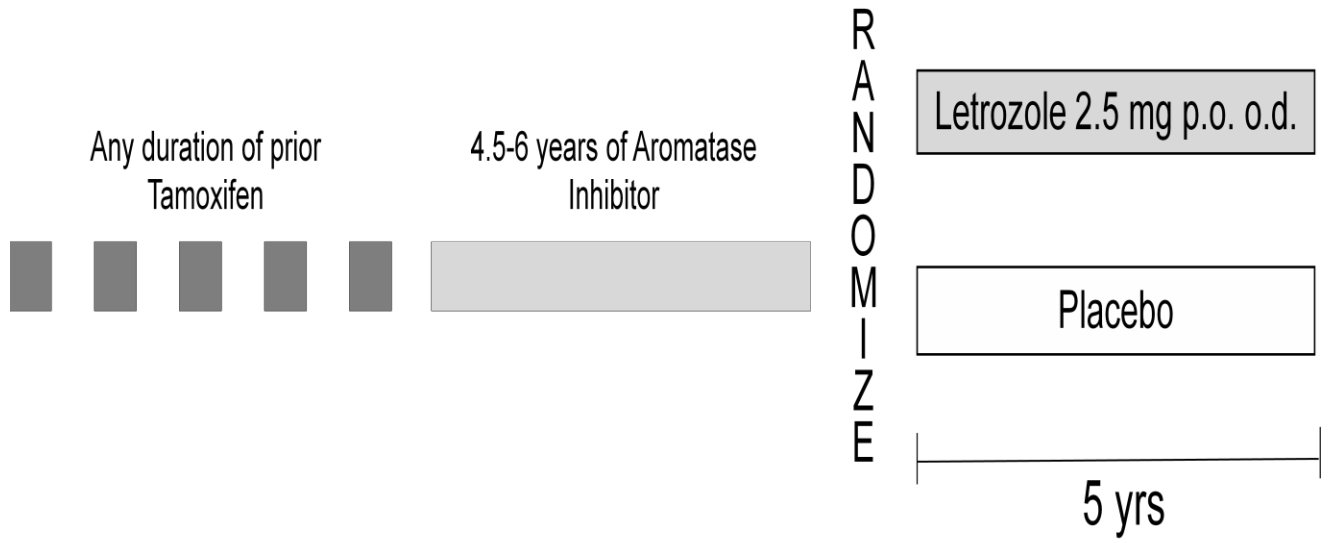

**Suppl Table S1: Protocol Reportable Serious Adverse Events**

|                              | Letrozole          |   |   |   |   |           |                | Placebo            |   |   |   |   |           |                 |
|------------------------------|--------------------|---|---|---|---|-----------|----------------|--------------------|---|---|---|---|-----------|-----------------|
| Evaluable Patients           | N=959              |   |   |   |   |           |                | N=954              |   |   |   |   |           |                 |
|                              | Grade <sup>s</sup> |   |   |   |   |           |                | Grade <sup>s</sup> |   |   |   |   |           |                 |
| Adverse Event                | 1                  | 2 | 3 | 4 | 5 | TOTAL (%) | % <sup>s</sup> | 1                  | 2 | 3 | 4 | 5 | TOTAL (%) | %R <sup>s</sup> |
| <b>Secondary Malignancy</b>  |                    |   |   |   |   |           |                |                    |   |   |   |   |           |                 |
| Secondary Malignancy         |                    |   |   |   | 3 | 3 (0)     | (0)            |                    |   |   |   | 3 | 3 (0)     | (0)             |
| <b>Cardiovascular</b>        |                    |   |   |   |   |           |                |                    |   |   |   |   |           |                 |
| Ventricular arrhythmia       |                    |   |   |   | 1 | 1 (0)     | (0)            |                    |   |   | 1 |   | 1(0)      | (0)             |
| Edema                        |                    | 1 |   |   |   | 1 (0)     | (0)            |                    |   |   |   |   |           |                 |
| Cardiac LVF                  |                    |   |   |   | 1 | 1 (0)     | (0)            |                    |   |   |   | 1 | 1 (0)     | (0)             |
| Ischemia/infarction          |                    |   |   |   | 2 | 2 (0)     | (0)            |                    |   |   |   | 4 | 4 (0)     | (0)             |
| Supraventricular arrhythmia  |                    |   | 1 |   |   | 1 (0)     | (0)            |                    |   |   |   |   |           |                 |
| Cardiac troponin I           |                    |   |   |   |   |           |                |                    |   |   | 1 |   | 1 (0)     | (0)             |
| Thrombosis/embolism          |                    |   |   |   |   |           |                |                    |   |   |   | 1 | 1 (0)     | (0)             |
| Other                        |                    |   |   |   | 1 | 1 (0)     | (0)            |                    |   |   |   |   |           |                 |
| <b>Flu-Like Symptoms</b>     |                    |   |   |   |   |           |                |                    |   |   |   |   |           |                 |
| Fatigue                      |                    | 1 |   |   |   | 1 (0)     | (0)            |                    |   |   |   |   |           |                 |
| Other                        |                    |   |   |   |   |           |                |                    |   | 1 |   |   | 1 (0)     | (0)             |
| <b>Renal</b>                 |                    |   |   |   |   |           |                |                    |   |   |   |   |           |                 |
| Creatinine                   |                    |   |   |   |   |           |                |                    |   | 1 |   |   | 1 (0)     | (0)             |
| Renal Failure                |                    |   |   |   | 3 | 3 (0)     | (0)            |                    |   |   |   | 2 | 2 (0)     | (0)             |
| <b>Hemorrhage</b>            |                    |   |   |   |   |           |                |                    |   |   |   |   |           |                 |
| CNS hemorrhage/bleeding      |                    |   |   |   |   |           |                |                    |   |   |   | 1 | 1 (0)     | (0)             |
| Melena/GI bleeding           |                    |   |   |   | 1 | 1 (0)     | (0)            |                    |   |   |   |   |           |                 |
| Rectal bleeding              |                    |   |   |   | 1 | 1 (0)     | (0)            |                    |   |   |   |   |           |                 |
| <b>Hepatic</b>               |                    |   |   |   |   |           |                |                    |   |   |   |   |           |                 |
| Liver dysfunction            |                    |   |   |   | 1 | 1 (0)     | (0)            |                    |   |   |   |   |           |                 |
| Other                        |                    |   |   |   | 1 | 1 (0)     | (0)            |                    |   |   |   |   |           |                 |
| <b>Infection</b>             |                    |   |   |   |   |           |                |                    |   |   |   |   |           |                 |
| Infection w/o neutropenia    |                    |   |   |   | 2 | 2 (0)     | (0)            |                    |   | 1 |   | 2 | 3 (0)     | (0)             |
| Infection-unknown ANC        |                    |   |   |   |   |           |                |                    |   |   |   | 1 | 1 (0)     | (0)             |
| <b>Neurology</b>             |                    |   |   |   |   |           |                |                    |   |   |   |   |           |                 |
| CNS cerebrovascular ischemia |                    |   |   |   |   |           |                |                    |   |   |   | 3 | 3 (0)     | (0)             |

|                            |  |  |   |  |    |        |     |  |  |  |   |   |       |        |     |
|----------------------------|--|--|---|--|----|--------|-----|--|--|--|---|---|-------|--------|-----|
| Neuropathy-motor           |  |  |   |  |    |        |     |  |  |  | 1 |   | 1 (0) | (0)    |     |
| <b>Other</b>               |  |  |   |  |    |        |     |  |  |  |   |   |       |        |     |
| Other                      |  |  |   |  | 4  | 4 (0)  | (0) |  |  |  |   | 1 | 1 (0) | (0)    |     |
| <b>Pulmonary</b>           |  |  |   |  |    |        |     |  |  |  |   |   |       |        |     |
| Pleural effusion           |  |  |   |  |    |        |     |  |  |  | 1 |   | 1 (0) | (0)    |     |
| Hypoxia                    |  |  | 1 |  |    | 1 (0)  | (0) |  |  |  |   | 1 | 1 (0) | (0)    |     |
| Pneumonitis                |  |  |   |  |    |        |     |  |  |  | 1 |   | 1 (0) | (0)    |     |
| Dyspnea                    |  |  |   |  |    |        |     |  |  |  | 1 |   | 1 (0) | (0)    |     |
| Other                      |  |  |   |  |    |        |     |  |  |  | 1 |   | 1     | 2 (0)  | (0) |
| <b>Worst Overall Grade</b> |  |  |   |  | 15 | 15 (2) | (0) |  |  |  |   |   | 19    | 19 (2) | (0) |

<sup>§</sup>Adverse events were graded according to Common Toxicity Criteria Version 2.0

<sup>§</sup>Considered by investigator to be 'possibly', 'probably' or 'definitely' related to protocol treatment.

LVF: left ventricular failure; w/o: without; GI: gastrointestinal



**Table S2: Baseline Characteristics**

| <b>Number of subjects (%)</b>                                                             |                     |                   |                  |
|-------------------------------------------------------------------------------------------|---------------------|-------------------|------------------|
|                                                                                           | Letrozole<br>N= 959 | Placebo<br>N= 959 | Total<br>N= 1918 |
| <b>Race/ethnicity</b>                                                                     |                     |                   |                  |
| White (not of Hispanic origin)                                                            | 884 (92.2)          | 878 (91.6)        | 1762 (91.9)      |
| Hispanic                                                                                  | 11 ( 1.1)           | 13 ( 1.4)         | 24 ( 1.3)        |
| Black (not of Hispanic origin)                                                            | 34 ( 3.5)           | 26 ( 2.7)         | 60 ( 3.1)        |
| Asian or Pacific Islander                                                                 | 17 ( 1.8)           | 23 ( 2.4)         | 40 ( 2.1)        |
| Native North American or Native Alaskan                                                   | 3 ( 0.3)            | 6 ( 0.6)          | 9 ( 0.5)         |
| Other                                                                                     | 2 ( 0.2)            | 6 ( 0.6)          | 8 ( 0.4)         |
| Unknown (or refusal)                                                                      | 8 ( 0.8)            | 7 ( 0.7)          | 15 ( 0.8)        |
| <b>Age (Years)*</b>                                                                       |                     |                   |                  |
| N                                                                                         | 959                 | 959               | 1918             |
| Median [interquartile range]                                                              | 65.6 [60.3–72.0]    | 64.8 [59.6–71.1]  | 65.1 [60.0–71.5] |
| < 70                                                                                      | 642 (66.9)          | 686 (71.5)        | 1328 (69.2)      |
| ≥70                                                                                       | 317 (33.1)          | 273 (28.5)        | 590 (30.8)       |
| <b>ECOG Performance Status</b>                                                            |                     |                   |                  |
| 0                                                                                         | 852 (88.8)          | 856 (89.3)        | 1708 (89.1)      |
| 1                                                                                         | 100 (10.4)          | 95 ( 9.9)         | 195 (10.2)       |
| 2                                                                                         | 7 ( 0.7)            | 8 ( 0.8)          | 15 ( 0.8)        |
| <b>Times (years) from first initial pathologic diagnosis to the date of randomization</b> |                     |                   |                  |
| N                                                                                         | 959                 | 959               | 1918             |
| Median years [interquartile range]                                                        | 10.6 [7.5-11.5]     | 10.6 [7.8-11.6]   | 10.6 [7.6-11.5]  |
| <b>Pathological T stage of disease at first diagnosis</b>                                 |                     |                   |                  |
| 0                                                                                         | 1 ( 0.1)            | 0 ( 0.0)          | 1 ( 0.1)         |
| 1                                                                                         | 552 (57.6)          | 535 (55.8)        | 1087 (56.7)      |
| 2                                                                                         | 312 (32.5)          | 335 (34.9)        | 647 (33.7)       |
| 3                                                                                         | 66 ( 6.9)           | 67 ( 7.0)         | 133 ( 6.9)       |
| 4                                                                                         | 21 ( 2.2)           | 12 ( 1.3)         | 33 ( 1.7)        |
| x                                                                                         | 7 ( 0.7)            | 10 ( 1.0)         | 17 ( 0.9)        |
| <b>Pathological stage N of disease at first diagnosis</b>                                 |                     |                   |                  |
| 0                                                                                         | 446 (46.5)          | 448 (46.7)        | 894 (46.6)       |
| 1                                                                                         | 456 (47.5)          | 455 (47.4)        | 911 (47.5)       |
| 2                                                                                         | 28 ( 2.9)           | 30 ( 3.1)         | 58 ( 3.0)        |
| 3                                                                                         | 8 ( 0.8)            | 9 ( 0.9)          | 17 ( 0.9)        |
| x                                                                                         | 21 ( 2.2)           | 17 ( 1.8)         | 38 ( 2.0)        |
| <b>Estrogen receptor status*</b>                                                          |                     |                   |                  |

|                                                                       |               |               |               |
|-----------------------------------------------------------------------|---------------|---------------|---------------|
| Positive                                                              | 904 (94.3)    | 920 (95.9)    | 1824 (95.1)   |
| Negative                                                              | 44 ( 4.6)     | 31 ( 3.2)     | 75 ( 3.9)     |
| Unknown                                                               | 4 ( 0.4)      | 7 ( 0.7)      | 11 ( 0.6)     |
| Missing                                                               | 7 ( 0.7)      | 1 ( 0.1)      | 8 ( 0.4)      |
| <b>Progesterone receptor status</b>                                   |               |               |               |
| Positive                                                              | 767 (80.0)    | 751 (78.3)    | 1518 (79.1)   |
| Negative                                                              | 132 (13.8)    | 147 (15.3)    | 279 (14.5)    |
| Unknown                                                               | 40 ( 4.2)     | 38 ( 4.0)     | 78 ( 4.1)     |
| Missing                                                               | 20 ( 2.1)     | 23 ( 2.4)     | 43 ( 2.2)     |
| <b>Hormone receptor status (estrogen and/or progesterone)</b>         |               |               |               |
| Positive                                                              | 945 (98.5)    | 950 (99.1)    | 1895 (98.8)   |
| Negative                                                              | 3 ( 0.3)      | 2 ( 0.2)      | 5 ( 0.3)      |
| Unknown                                                               | 4 ( 0.4)      | 5 ( 0.5)      | 9 ( 0.5)      |
| Missing                                                               | 7 ( 0.7)      | 2 ( 0.2)      | 9 ( 0.5)      |
| <b>Years on tamoxifen</b>                                             |               |               |               |
| N                                                                     | 959           | 959           | 1918          |
| median [interquartile range]                                          | 5.0 [2.0-5.0] | 5.0 [2.0-5.0] | 5.0 [2.0-5.0] |
| 0 years                                                               | 199 (20.8)    | 198 (20.6)    | 397 (20.7)    |
| < 2 years                                                             | 40 ( 4.2)     | 40 ( 4.2)     | 80 ( 4.2)     |
| 2-4.5 years                                                           | 43 ( 4.5)     | 29 ( 3.0)     | 72 ( 3.8)     |
| 4.5 to 5 years                                                        | 315 (32.8)    | 322 (33.6)    | 637 (33.2)    |
| 5 to 5.5 years                                                        | 336 (35.0)    | 342 (35.7)    | 678 (35.3)    |
| 5.5 to 6 years                                                        | 19 ( 2.0)     | 20 ( 2.1)     | 39 ( 2.0)     |
| > 6 years                                                             | 7 ( 0.7)      | 8 ( 0.8)      | 15 ( 0.8)     |
| <b>Duration of previous AI therapy</b>                                |               |               |               |
| N                                                                     | 959           | 958           | 1917          |
| Median [interquartile range]                                          | 5.0 [5.0-5.1] | 5.0 [5.0-5.1] | 5.0 [5.0-5.1] |
| Missing                                                               | 0 ( 0.0)      | 1 ( 0.1)      | 1 ( 0.1)      |
| < 4.5 years                                                           | 3 ( 0.3)      | 2 ( 0.2)      | 5 ( 0.3)      |
| 4.5 to 5 years                                                        | 356 (37.1)    | 347 (36.2)    | 703 (36.7)    |
| 5 to 5.5 years                                                        | 557 (58.1)    | 568 (59.2)    | 1125 (58.7)   |
| 5.5 to 6 years                                                        | 36 ( 3.8)     | 35 ( 3.6)     | 71 ( 3.7)     |
| > 6 years                                                             | 7 ( 0.7)      | 6 ( 0.6)      | 13 ( 0.7)     |
| <b>Type of previous AI therapy</b>                                    |               |               |               |
| Letrozole                                                             | 714 (74.5)    | 718 (74.9)    | 1432 (74.7)   |
| Anastrozole                                                           | 212 (22.1)    | 210 (21.9)    | 422 (22.0)    |
| Exemestane                                                            | 55 ( 5.7)     | 54 ( 5.6)     | 109 ( 5.7)    |
| <b>Continuous breaks of longer than 6 months in treatment with AI</b> |               |               |               |

|                                                                                    |            |            |             |
|------------------------------------------------------------------------------------|------------|------------|-------------|
| No                                                                                 | 955 (99.6) | 953 (99.4) | 1908 (99.5) |
| Yes                                                                                | 4 ( 0.4)   | 6 ( 0.6)   | 10 ( 0.5)   |
| <b>Interval between last dose of aromatase inhibitor therapy and randomization</b> |            |            |             |
| Missing                                                                            | 0 ( 0.0)   | 1 ( 0.1)   | 1 ( 0.1)    |
| Negative <sup>§</sup>                                                              | 11 ( 1.1)  | 9 ( 0.9)   | 20 ( 1.0)   |
| < 6 months                                                                         | 863 (90.0) | 864 (90.1) | 1727 (90.0) |
| 6 months to 2 years                                                                | 81 ( 8.4)  | 81 ( 8.4)  | 162 ( 8.4)  |
| > 2 years                                                                          | 4 ( 0.4)   | 4 ( 0.4)   | 8 ( 0.4)    |
| <b>Prior adjuvant chemotherapy</b>                                                 |            |            |             |
| No                                                                                 | 398 (41.5) | 402 (41.9) | 800 (41.7)  |
| Yes                                                                                | 561 (58.5) | 557 (58.1) | 1118 (58.3) |
| <b>Prior surgery</b>                                                               |            |            |             |
| Lymph Node Dissection                                                              | 861 (89.8) | 872 (90.9) | 1733 (90.4) |
| Lumpectomy                                                                         | 583 (60.8) | 575 (60.0) | 1158 (60.4) |
| Mastectomy                                                                         | 459 (47.9) | 472 (49.2) | 931 (48.5)  |

\* P<0.05 for the comparison between treatment groups.

§Very few patients continued taking their original AI therapy after randomization but most of them stopped after randomization.

AI: aromatase inhibitor

## **Trial Registration**

The MA.17R trial was considered an amendment to the original MA.17 trial (NCT00003140) registered in 1999 and published in 2003 (Goss PE, Ingle JN, Martino S, et al. A randomized trial of letrozole in postmenopausal women after five years of tamoxifen therapy for early-stage breast cancer. *N Engl J Med* 2003; 349:1793-802).

Patients began entering the MA.17R study amendment in October 2004. In 2008, the MA.17R study was registered independently and given a separate NCT number (NCT00754845).
